# Supplementary material
Source: PubMed Central journal article supplement (PMC5963530)
Supplement: NIHMS967864-supplement-SI.pdf [file NIHMS967864-supplement-SI.pdf]

## Supporting Information

### **ATPbind: accurate protein-ATP binding site prediction by combining sequence-profiling and structure-based comparisons**

Jun Hu<sup>†,‡</sup>, Yang Li<sup>†,‡</sup>, Yang Zhang<sup>‡,\*</sup> and Dong-Jun Yu<sup>†,\*</sup>

<sup>†</sup>School of Computer Science and Engineering, Nanjing University of Science and Technology, Xiaolingwei 200, Nanjing, China, 210094, <sup>‡</sup>Department of Computational Medicine and Bioinformatics, University of Michigan, 100 Washtenaw, Ann Arbor, MI 48109-2218, USA

\*Email: [zhng@umich.edu](mailto:zhng@umich.edu) or [njyudj@njust.edu.cn](mailto:njyudj@njust.edu.cn)

## Supporting Texts

### **Text S1: Comparison between S-SITEatp with S-SITE**

Table S2 compares the results from S-SITEatp and S-SITE on PATP-TEST. From Table S2, we can find that S-SITEatp has a comparable performance with the original S-SITE although having a slightly lower MCC value than S-SITE.

In order to further compare S-SITEatp and S-SITE, one protein (4xbrA), which consists of 17 ATP-binding residues and 298 non-ATP-binding residues, is used for case study. In this case study, although the true positive numbers of S-SITEatp and S-SITE are both 17, the false positive number of S-SITEatp, which is 34, is less than that of S-SITE, i.e., 76. The running time of S-SITEatp is 105.55s, while the running time of S-SITE is 24,705.89s in the same computational condition. S-SITE searches 2,133 template protein pockets with different ligand types (not only ATP) to locate the binding sites together, so that it cannot tell us the predicted binding sites whether bind ATP or not. In a word, S-SITEatp, which is an ATP-specific S-SITE, is more suitable than a general-purpose predictor, S-SITE, for protein-ATP binding sites prediction.

### **Text S2: Comparison between TM-SITEatp with TM-SITE**

Table S3 compares the discriminative performance between TM-SITEatp and TM-SITE on PATP-TEST. It is easily found that TM-SITEatp has a slightly higher MCC value than TM-SITE.

To further compare TM-SITEatp and TM-SITE, the protein 4xbrA is also employed for case study. In this case study, although the true positive numbers of TM-SITEatp and TM-SITE are both 17, the false positive number of TM-SITEatp, which is 14, is less than that of TM-SITE, i.e., 36. The running time of TM-SITEatp is 253.57s, while the running time of TM-SITE is 13,784.63s in the same computational condition. Since TM-SITE searches 392 template protein pockets with different ligand types (not only ATP) to identify the binding sites together, it does not tell us the predicted binding sites whether bind ATP or not.

### **Text S3: Cross-validation test**

In the K-fold cross-validation test, the training proteins are first randomly partitioned into K disjoint subsets; K-1 subsets are used for training model and remaining one subset is employed for testing; this practice continued until all the K subsets of the training dataset are traversed over; the final performance is obtained by evaluating the combination of the predicted results of all the testing subsets.

## Supporting Figures

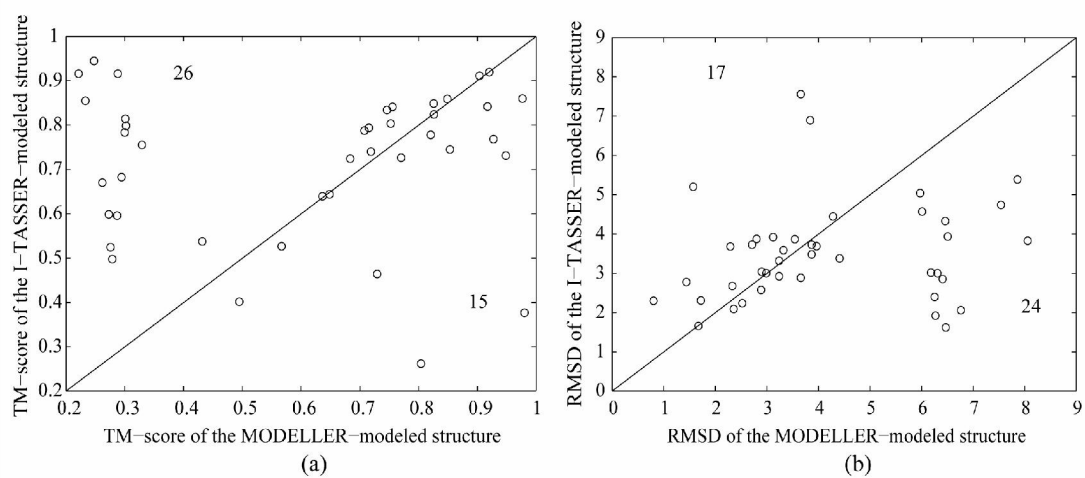

**Figure S1.** Head-to-head comparisons between I-TASSER and MODELLER on PATP-TEST: (a) TM-score-based comparison; (b) RMSD-based comparison. The numbers in each panel represent the number of points in the upper and lower triangle, respectively.

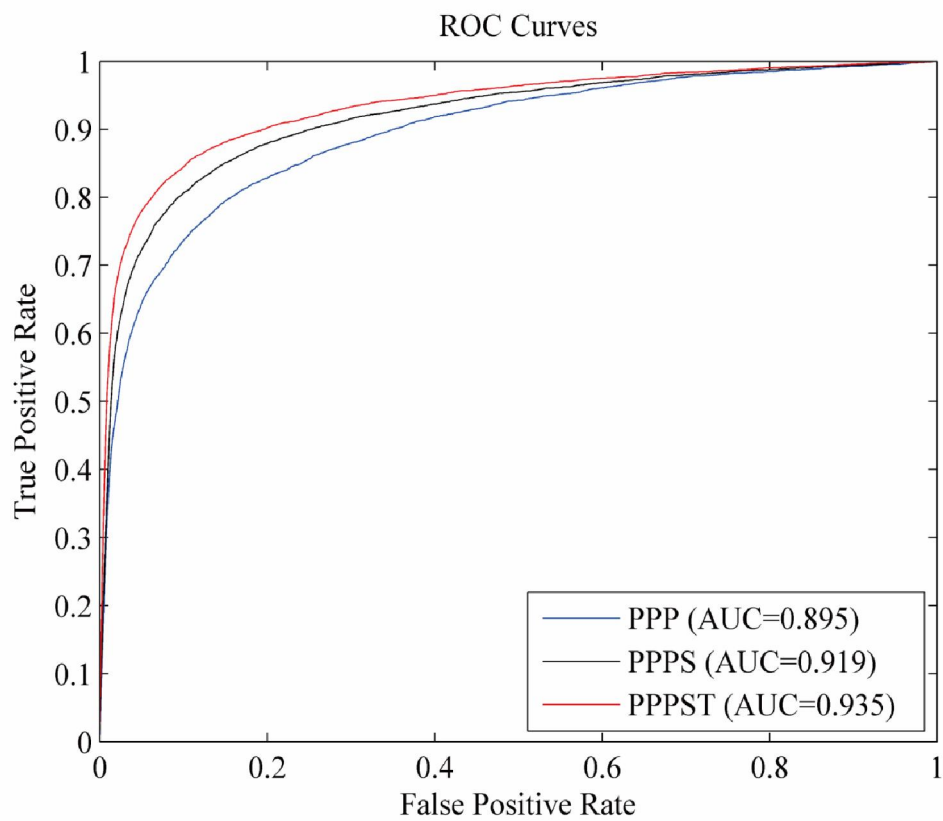

**Figure S2.** ROC curves of the PPP, PPPS, and PPPST features over five-fold cross-validation tests with the single SVM classifier.

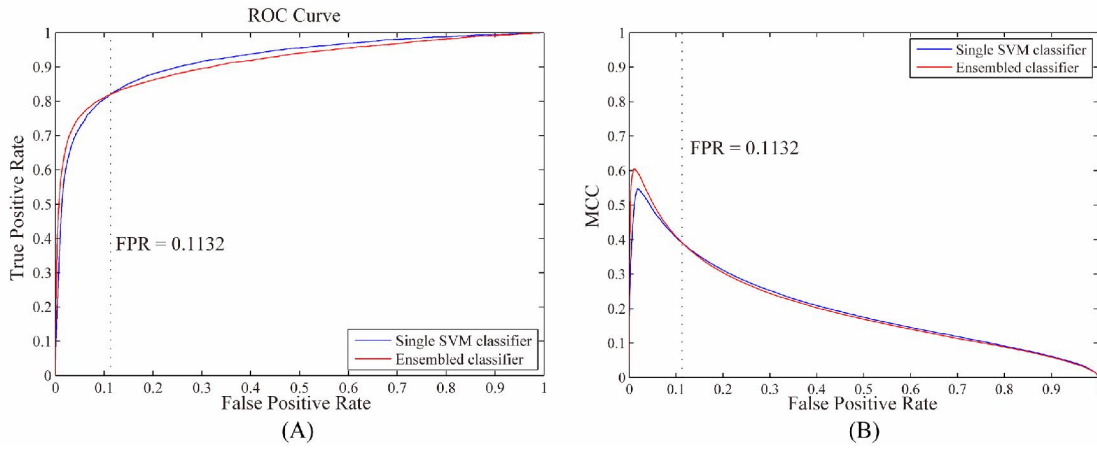

**Figure S3.** (A) ROC curves of the ensembled classified and single SVM classifier over five-fold cross-validation tests with the PPPS feature. (B) The variation curves of MCC versus false positive rate of the ensembled classified and single SVM classifier over five-fold cross-validation tests with the PPPS features. FPR and TPR represent false positive rate and true positive rate, respectively.

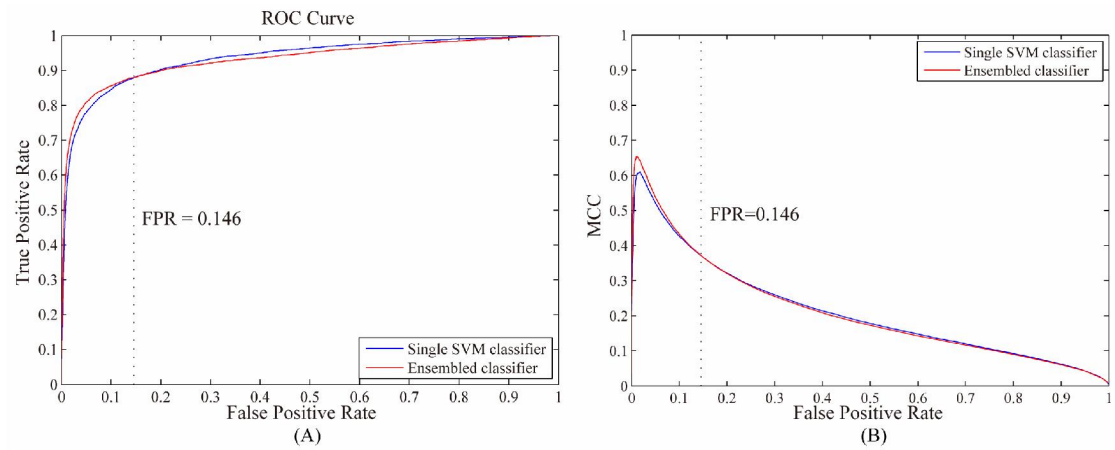

**Figure S4.** (A) ROC curves of the ensembled classified and single SVM classifier over five-fold cross-validation tests with the PPPST feature. (B) The variation curves of MCC versus false positive rate of the ensembled classified and single SVM classifier over five-fold cross-validation tests with the PPPST features. FPR and TPR represent false positive rate and true positive rate, respectively.

## Supporting Tables

**Table S1.** The maximum sequence identity of each protein in PATP-TEST against all proteins in PATP-388

| Protein in PATP-TEST | Protein in PATP-388 <sup>a</sup> | Maximum Sequence Identity (%) | Protein in PATP-TEST | Protein in PATP-388 <sup>a</sup> | Maximum Sequence Identity (%) |
|----------------------|----------------------------------|-------------------------------|----------------------|----------------------------------|-------------------------------|
| 5DN6A                | 3EPSA                            | 17.31                         | 3J94A                | 1SVMC                            | 19.18                         |
| 3J8YK                | 3GNIB                            | 21.52                         | 4WVYA                | 4O5FA                            | 14.75                         |
| 4XVUH                | 4AZWA                            | 16.71                         | 5A98A                | 4WH3A                            | 13.87                         |
| 5D15B                | 3J1FM                            | 8.51                          | 4YB7A                | 1ZAOA                            | 18.24                         |
| 4RX6B                | 4OZNA                            | 33.62                         | 5ECKA                | 1N48A                            | 14.41                         |
| 4XBRA                | 4K6RA                            | 17.06                         | 5DN3A                | 1II0B                            | 13.92                         |
| 5EWGA                | 1OS1A                            | 15.83                         | 4RV7C                | 3UQDD                            | 13.59                         |
| 5DB4A                | 1KO5A                            | 17.88                         | 5EOUB                | 1B0UA                            | 17.05                         |
| 4S1KA                | 4JYZA                            | 12.55                         | 5COUA                | 2ZT7A                            | 13.40                         |
| 4YDSA                | 2CBZA                            | 21.30                         | 5APBA                | 2HIXA                            | 19.93                         |
| 4X2DA                | 3I7VA                            | 13.22                         | 4D79C                | 4QQXA                            | 8.75                          |
| 5BSMA                | 2KMXA                            | 9.81                          | 5D9HB                | 2Y27B                            | 16.31                         |
| 5CYRB                | 4WAEA                            | 17.47                         | 4XHOA                | 3REUA                            | 17.89                         |
| 5E84F                | 1J7KA                            | 13.20                         | 5F1CB                | 1W7AA                            | 11.13                         |
| 4ZGNA                | 1WKLB                            | 11.83                         | 5A99A                | 3WHLB                            | 10.12                         |
| 5D6JA                | 1ESQC                            | 12.06                         | 4XRUA                | 4BJRA                            | 13.80                         |
| 4XJXB                | 2Q66A                            | 15.06                         | 5BURA                | 5HKKO                            | 15.37                         |
| 5E3IB                | 3HNEB                            | 14.09                         | 4XRUB                | 3TY5A                            | 23.10                         |
| 5ETLD                | 1QHXA                            | 17.98                         | 4ZS4B                | 1EE1A                            | 19.19                         |
| 4WZYA                | 2E5YA                            | 10.86                         | 5D1OA                | 3LL3A                            | 17.43                         |
| 4RQVA                | 4FO0A                            | 14.54                         |                      |                                  |                               |

<sup>a</sup> Protein in PATP-388 which has the maximum sequence identity with the corresponding protein in PATP-TEST.

**Table S2.** Comparison between S-SITEatp and S-SITE on PATP-TEST

| Predictor | <i>Sen (%)</i> | <i>Spe (%)</i> | <i>Acc (%)</i> | <i>Pre (%)</i> | <i>MCC</i> |
|-----------|----------------|----------------|----------------|----------------|------------|
| S-SITEatp | 67.51          | 92.65          | 91.51          | 30.41          | 0.416      |
| S-SITE    | 64.69          | 93.50          | 92.19          | 32.13          | 0.420      |



**Table S3.** Comparison between TM-SITEatp and TM-SITE on PATP-TEST

| Predictor  | <i>Sen (%)</i> | <i>Spe (%)</i> | <i>Acc (%)</i> | <i>Pre (%)</i> | <i>MCC</i> |
|------------|----------------|----------------|----------------|----------------|------------|
| TM-SITEatp | 78.78          | 96.27          | 95.48          | 50.14          | 0.607      |
| TM-SITE    | 57.12          | 98.69          | 96.80          | 67.43          | 0.604      |

**Table S4.** Comparison of the quality of the I-TASSER-modeled structure with that of the MODELLER-modeled structure on PATP-TEST

| Protein | I-TASSER |                   | MODELLER |      | Protein | I-TASSER |       | MODELLER |       |
|---------|----------|-------------------|----------|------|---------|----------|-------|----------|-------|
|         | TM-score | RMSD <sup>a</sup> | TM-score | RMSD |         | TM-score | RMSD  | TM-score | RMSD  |
| 5DN6A   | 0.78743  | 3.48              | 0.70776  | 3.87 | 3J94A   | 0.53735  | 6.90  | 0.43203  | 3.84  |
| 3J8YK   | 0.68244  | 4.33              | 0.29436  | 6.46 | 4WVYA   | 0.46395  | 3.73  | 0.72938  | 2.71  |
| 4XVUH   | 0.72636  | 3.88              | 0.77028  | 2.80 | 5A98A   | 0.94468  | 1.62  | 0.24736  | 6.47  |
| 5D15B   | 0.91912  | 1.66              | 0.92047  | 1.67 | 4YB7A   | 0.63931  | 3.59  | 0.6362   | 3.32  |
| 4RX6B   | 0.82375  | 2.09              | 0.82601  | 2.36 | 5ECKA   | 0.66999  | 4.74  | 0.26173  | 7.54  |
| 4XBRA   | 0.79851  | 2.86              | 0.30174  | 6.41 | 5DN3A   | 0.81421  | 3.00  | 0.301    | 6.31  |
| 5EWGA   | 0.83404  | 3.73              | 0.74621  | 3.87 | 4RV7C   | 0.52651  | 2.68  | 0.5669   | 2.33  |
| 5DB4A   | 0.84174  | 2.31              | 0.91739  | 1.72 | 5EOUB   | 0.84885  | 3.00  | 0.82551  | 2.99  |
| 4S1KA   | 0.85492  | 2.40              | 0.2327   | 6.25 | 5COUA   | 0.52448  | 5.04  | 0.2758   | 5.97  |
| 4YDSA   | 0.8034   | 3.04              | 0.75254  | 2.90 | 5APBA   | 0.77817  | 3.32  | 0.8206   | 3.24  |
| 4X2DA   | 0.8588   | 2.58              | 0.84862  | 2.89 | 4D79C   | 0.74033  | 2.93  | 0.71889  | 3.24  |
| 5BSMA   | 0.76876  | 3.68              | 0.92713  | 2.29 | 5D9HB   | 0.78348  | 3.02  | 0.29984  | 6.18  |
| 5CYRB   | 0.72463  | 3.87              | 0.68364  | 3.54 | 4XHOA   | 0.75503  | 3.94  | 0.32911  | 6.51  |
| 5E84F   | 0.59583  | 3.83              | 0.28664  | 8.06 | 5F1CB   | 0.26159  | 7.56  | 0.80403  | 3.66  |
| 4ZGNA   | 0.49753  | 4.57              | 0.27882  | 6.01 | 5A99A   | 0.91625  | 1.92  | 0.22132  | 6.27  |
| 5D6JA   | 0.79357  | 4.45              | 0.71556  | 4.28 | 4XRUA   | 0.40156  | 2.89  | 0.49453  | 3.66  |
| 4XJXB   | 0.37701  | 5.20              | 0.98009  | 1.57 | 5BURA   | 0.74539  | 3.92  | 0.85328  | 3.12  |
| 5E3IB   | 0.84095  | 3.38              | 0.75542  | 4.41 | 4XRUB   | 0.64416  | 3.69  | 0.64831  | 3.96  |
| 5ETLD   | 0.85984  | 2.30              | 0.97654  | 0.80 | 4ZS4B   | 0.73152  | 2.78  | 0.94825  | 1.44  |
| 4WZYA   | 0.59873  | 5.39              | 0.27251  | 7.86 | 5D1OA   | 0.91156  | 2.24  | 0.90375  | 2.52  |
| 4RQVA   | 0.91564  | 2.06              | 0.2881   | 6.76 | Average | 0.721    | 3.502 | 0.605    | 4.197 |

<sup>a</sup> The measurement unit is Å.

**Table S5.** The prediction performance of ATPbind (EXP \*) on each protein in PATP-TEST.

| Protein name | Sen (%) | Spe (%) | Acc (%) | Pre (%) | MCC    | Protein name | Sen (%) | Spe (%) | Acc (%) | Pre (%) | MCC    |
|--------------|---------|---------|---------|---------|--------|--------------|---------|---------|---------|---------|--------|
| 5DN6A        | 55.56   | 99.40   | 98.61   | 62.50   | 0.582  | 3J94A        | 34.48   | 98.26   | 94.49   | 55.56   | 0.411  |
| 3J8YK        | 46.67   | 99.68   | 97.27   | 87.50   | 0.628  | 4WVYA        | 61.90   | 99.75   | 97.89   | 92.86   | 0.749  |
| 4XVUH        | 59.09   | 99.31   | 96.46   | 86.67   | 0.699  | 5A98A        | 28.57   | 96.93   | 94.89   | 22.22   | 0.226  |
| 5D15B        | 40.91   | 100.00  | 92.07   | 100.00  | 0.612  | 4YB7A        | 0.00    | 99.64   | 94.59   | 0.00    | -0.013 |
| 4RX6B        | 60.00   | 98.95   | 92.17   | 92.31   | 0.706  | 5ECKA        | 26.32   | 98.55   | 96.13   | 38.46   | 0.299  |
| 4XBRA        | 76.47   | 97.32   | 96.19   | 61.90   | 0.668  | 5DN3A        | 90.00   | 98.77   | 98.11   | 85.71   | 0.868  |
| 5EWGA        | 92.31   | 99.51   | 99.29   | 85.71   | 0.886  | 4RV7C        | 0.00    | 99.31   | 89.44   | 0.00    | -0.026 |
| 5DB4A        | 80.95   | 98.10   | 96.09   | 85.00   | 0.808  | 5EOUB        | 100.00  | 99.11   | 99.15   | 84.21   | 0.914  |
| 4S1KA        | 0.00    | 99.12   | 94.92   | 0.00    | -0.019 | 5COUA        | 47.06   | 98.14   | 95.58   | 57.14   | 0.496  |
| 4YDSA        | 84.62   | 99.06   | 98.23   | 84.62   | 0.837  | 5APBA        | 94.12   | 98.34   | 98.20   | 66.67   | 0.784  |
| 4X2DA        | 93.33   | 97.64   | 97.36   | 73.68   | 0.816  | 4D79C        | 94.44   | 98.71   | 98.41   | 85.00   | 0.888  |
| 5BSMA        | 95.24   | 100.00  | 99.81   | 100.00  | 0.975  | 5D9HB        | 76.19   | 97.79   | 96.25   | 72.73   | 0.724  |
| 5CYRB        | 30.77   | 98.77   | 97.44   | 33.33   | 0.307  | 4XHOA        | 70.00   | 99.14   | 97.56   | 82.35   | 0.747  |
| 5E84F        | 85.71   | 99.66   | 99.17   | 90.00   | 0.874  | 5F1CB        | 0.00    | 99.71   | 96.06   | 0.00    | -0.010 |
| 4ZGNA        | 61.11   | 98.85   | 96.42   | 78.57   | 0.675  | 5A99A        | 0.00    | 96.75   | 96.36   | 0.00    | -0.012 |
| 5D6JA        | 94.12   | 99.35   | 99.21   | 80.00   | 0.864  | 4XRUA        | 90.00   | 100.00  | 99.65   | 100.00  | 0.947  |
| 4XJXB        | 44.44   | 99.88   | 98.73   | 88.89   | 0.624  | 5BURA        | 100.00  | 99.56   | 99.58   | 90.00   | 0.947  |
| 5E3IB        | 92.31   | 99.48   | 99.25   | 85.71   | 0.886  | 4XRUB        | 72.22   | 99.47   | 98.22   | 86.67   | 0.782  |
| 5ETLD        | 12.50   | 94.44   | 86.25   | 20.00   | 0.086  | 4ZS4B        | 47.06   | 99.58   | 96.11   | 88.89   | 0.631  |
| 4WZYA        | 63.64   | 98.86   | 98.00   | 58.33   | 0.599  | 5D1OA        | 70.59   | 99.72   | 98.40   | 92.31   | 0.800  |
| 4RQVA        | 100.00  | 99.26   | 99.31   | 90.48   | 0.948  |              |         |         |         |         |        |

\*EXP means that the experimental 3D structure information is used by ATPbind

**Table S6.** The prediction performance of ATPbind (ITA<sup>\*</sup>) on each protein in PATP-TEST.

| Protein name | Sen (%) | Spe (%) | Acc (%) | Pre (%) | MCC   | Protein name | Sen (%) | Spe (%) | Acc (%) | Pre (%) | MCC    |
|--------------|---------|---------|---------|---------|-------|--------------|---------|---------|---------|---------|--------|
| 5DN6A        | 55.56   | 99.40   | 98.61   | 62.50   | 0.582 | 3J94A        | 31.03   | 98.26   | 94.29   | 52.94   | 0.378  |
| 3J8YK        | 20.00   | 98.73   | 95.15   | 42.86   | 0.271 | 4WVYA        | 52.38   | 98.52   | 96.25   | 64.71   | 0.563  |
| 4XVUH        | 68.18   | 99.31   | 97.11   | 88.24   | 0.761 | 5A98A        | 42.86   | 97.37   | 95.74   | 33.33   | 0.356  |
| 5D15B        | 40.91   | 100.00  | 92.07   | 100.00  | 0.612 | 4YB7A        | 13.33   | 98.93   | 94.59   | 40.00   | 0.209  |
| 4RX6B        | 80.00   | 98.95   | 95.65   | 94.12   | 0.843 | 5ECKA        | 21.05   | 97.82   | 95.25   | 25.00   | 0.205  |
| 4XBRA        | 76.47   | 97.32   | 96.19   | 61.90   | 0.668 | 5DN3A        | 90.00   | 98.77   | 98.11   | 85.71   | 0.868  |
| 5EWGA        | 92.31   | 99.51   | 99.29   | 85.71   | 0.886 | 4RV7C        | 6.25    | 95.17   | 86.34   | 12.50   | 0.020  |
| 5DB4A        | 90.48   | 98.73   | 97.77   | 90.48   | 0.892 | 5EOUB        | 100.00  | 99.11   | 99.15   | 84.21   | 0.914  |
| 4SIKA        | 20.00   | 99.12   | 95.76   | 50.00   | 0.298 | 5COUA        | 70.59   | 98.45   | 97.05   | 70.59   | 0.690  |
| 4YDSA        | 84.62   | 99.06   | 98.23   | 84.62   | 0.837 | 5APBA        | 94.12   | 98.76   | 98.60   | 72.73   | 0.821  |
| 4X2DA        | 93.33   | 98.11   | 97.80   | 77.78   | 0.841 | 4D79C        | 88.89   | 98.71   | 98.01   | 84.21   | 0.854  |
| 5BSMA        | 90.48   | 99.80   | 99.43   | 95.00   | 0.924 | 5D9HB        | 71.43   | 97.79   | 95.90   | 71.43   | 0.692  |
| 5CYRB        | 30.77   | 99.08   | 97.74   | 40.00   | 0.340 | 4XHOA        | 35.00   | 99.14   | 95.66   | 70.00   | 0.476  |
| 5E84F        | 85.71   | 99.66   | 99.17   | 90.00   | 0.874 | 5F1CB        | 23.08   | 96.49   | 93.80   | 20.00   | 0.183  |
| 4ZGNA        | 44.44   | 98.47   | 94.98   | 66.67   | 0.520 | 5A99A        | 0.00    | 98.37   | 97.98   | 0.00    | -0.008 |
| 5D6JA        | 94.12   | 99.02   | 98.89   | 72.73   | 0.822 | 4XRUA        | 90.00   | 100.00  | 99.65   | 100.00  | 0.947  |
| 4XJXB        | 44.44   | 100.00  | 98.84   | 100.00  | 0.663 | 5BURA        | 100.00  | 99.56   | 99.58   | 90.00   | 0.947  |
| 5E3IB        | 84.62   | 99.48   | 98.99   | 84.62   | 0.841 | 4XRUB        | 61.11   | 99.73   | 97.97   | 91.67   | 0.739  |
| 5ETLD        | 6.25    | 93.75   | 85.00   | 10.00   | 0.000 | 4ZS4B        | 47.06   | 99.58   | 96.11   | 88.89   | 0.631  |
| 4WZYA        | 72.73   | 98.18   | 97.56   | 50.00   | 0.591 | 5D1OA        | 58.82   | 99.44   | 97.60   | 83.33   | 0.689  |
| 4RQVA        | 100.00  | 99.26   | 99.31   | 90.48   | 0.948 |              |         |         |         |         |        |

\* ITA means that the I-TASSER-modeled 3D structure information is used by ATPbind

**Table S7.** The prediction performance of ATPseq on each protein in PATP-TEST.

| Protein name | Sen (%) | Spe (%) | Acc (%) | Pre (%) | MCC    | Protein name | Sen (%) | Spe (%) | Acc (%) | Pre (%) | MCC    |
|--------------|---------|---------|---------|---------|--------|--------------|---------|---------|---------|---------|--------|
| 5DN6A        | 55.56   | 98.59   | 97.82   | 41.67   | 0.470  | 3J94A        | 31.03   | 98.26   | 94.29   | 52.94   | 0.378  |
| 3J8YK        | 46.67   | 99.68   | 97.27   | 87.50   | 0.628  | 4WVYA        | 47.62   | 99.75   | 97.19   | 90.91   | 0.647  |
| 4XVUH        | 63.64   | 99.31   | 96.78   | 87.50   | 0.731  | 5A98A        | 0.00    | 99.12   | 96.17   | 0.00    | -0.016 |
| 5D15B        | 54.55   | 100.00  | 93.90   | 100.00  | 0.714  | 4YB7A        | 13.33   | 98.93   | 94.59   | 40.00   | 0.209  |
| 4RX6B        | 80.00   | 96.84   | 93.91   | 84.21   | 0.784  | 5ECKA        | 0.00    | 99.82   | 96.49   | 0.00    | -0.008 |
| 4XBRA        | 76.47   | 97.32   | 96.19   | 61.90   | 0.668  | 5DN3A        | 90.00   | 98.77   | 98.11   | 85.71   | 0.868  |
| 5EWGA        | 92.31   | 99.51   | 99.29   | 85.71   | 0.886  | 4RV7C        | 6.25    | 97.93   | 88.82   | 25.00   | 0.080  |
| 5DB4A        | 80.95   | 97.47   | 95.53   | 80.95   | 0.784  | 5EOUB        | 100.00  | 99.40   | 99.43   | 88.89   | 0.940  |
| 4S1KA        | 0.00    | 98.67   | 94.49   | 0.00    | -0.024 | 5COUA        | 5.88    | 99.38   | 94.69   | 33.33   | 0.123  |
| 4YDSA        | 92.31   | 100.00  | 99.56   | 100.00  | 0.959  | 5APBA        | 94.12   | 98.34   | 98.20   | 66.67   | 0.784  |
| 4X2DA        | 86.67   | 98.11   | 97.36   | 76.47   | 0.800  | 4D79C        | 88.89   | 98.28   | 97.61   | 80.00   | 0.831  |
| 5BSMA        | 95.24   | 100.00  | 99.81   | 100.00  | 0.975  | 5D9HB        | 71.43   | 98.16   | 96.25   | 75.00   | 0.712  |
| 5CYRB        | 0.00    | 99.85   | 97.89   | 0.00    | -0.005 | 4XHOA        | 25.00   | 99.43   | 95.39   | 71.43   | 0.405  |
| 5E84F        | 90.48   | 99.83   | 99.50   | 95.00   | 0.925  | 5F1CB        | 0.00    | 99.71   | 96.06   | 0.00    | -0.010 |
| 4ZGNA        | 44.44   | 99.23   | 95.70   | 80.00   | 0.577  | 5A99A        | 0.00    | 99.19   | 98.79   | 0.00    | -0.006 |
| 5D6JA        | 94.12   | 99.35   | 99.21   | 80.00   | 0.864  | 4XRUA        | 80.00   | 100.00  | 99.29   | 100.00  | 0.891  |
| 4XJXB        | 44.44   | 100.00  | 98.84   | 100.00  | 0.663  | 5BURA        | 100.00  | 99.56   | 99.58   | 90.00   | 0.947  |
| 5E3IB        | 69.23   | 99.48   | 98.49   | 81.82   | 0.745  | 4XRUB        | 16.67   | 99.47   | 95.69   | 60.00   | 0.301  |
| 5ETLD        | 6.25    | 98.61   | 89.38   | 33.33   | 0.108  | 4ZS4B        | 11.76   | 98.75   | 93.00   | 40.00   | 0.189  |
| 4WZYA        | 0.00    | 99.77   | 97.34   | 0.00    | -0.007 | 5D1OA        | 35.29   | 100.00  | 97.07   | 100.00  | 0.585  |
| 4RQVA        | 100.00  | 99.26   | 99.31   | 90.48   | 0.948  |              |         |         |         |         |        |
